# Supplementary material for: Clinical and immunological features of severe and moderate coronavirus disease 2019
Source: JCI journal article supplement (doi:10.1172/jci137244), 2020-03-27
Supplement: sd2 [file 2]

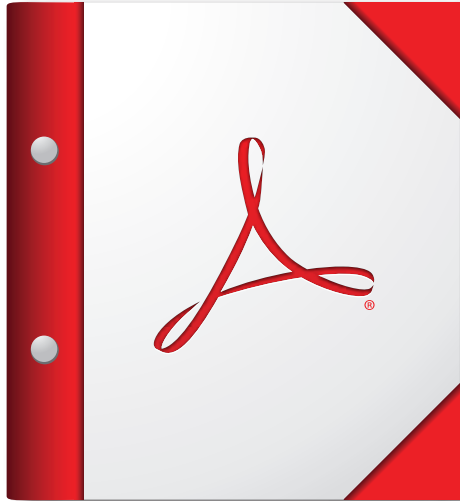

**For the best experience, open this PDF portfolio in  
Acrobat X or Adobe Reader X, or later.**

[Get Adobe Reader Now!](#)
